# Supplementary material
Source: ML conference proceedings conference paper supplement (https://openreview.net/forum?id=LUVqEs90mq)
Supplement: supplementary_material [file attachment]

---

# Stochastic Optimal Control for Collective Variable Free Sampling of Molecular Transition Paths

---

Anonymous Author(s)

Affiliation

Address

email

## Abstract

1 We consider the problem of sampling transition paths between two given metastable  
2 states of a molecular system, e.g. a folded and unfolded protein or products and  
3 reactants of a chemical reaction. Due to the existence of high energy barriers  
4 separating the states, these transition paths are unlikely to be sampled with standard  
5 Molecular Dynamics (MD) simulation. Traditional methods to augment MD with  
6 a bias potential to increase the probability of the transition rely on a dimensionality  
7 reduction step based on Collective Variables (CVs). Unfortunately, selecting  
8 appropriate CVs requires chemical intuition and traditional methods are therefore  
9 not always applicable to larger systems. Additionally, when incorrect CVs are  
10 used, the bias potential might not be minimal and bias the system along dimensions  
11 irrelevant to the transition. Showing a formal relation between the problem of  
12 sampling molecular transition paths, the Schrödinger bridge problem and stochastic  
13 optimal control with neural network policies, we propose a machine learning  
14 method for sampling said transitions. Unlike previous non-machine learning  
15 approaches our method, named PIPS, does not depend on CVs. We show that our  
16 method successfully generates low energy transitions for Alanine Dipeptide as well  
17 as the larger Polyproline and Chignolin proteins.

## 18 1 Introduction

19 Molecular Dynamics (MD) is a central tool in the (bio-)chemistry toolbox. By integrating Newton's  
20 equations of motion on a molecular scale, MD can provide insight into chemical processes and  
21 systems without requiring expensive lab testing [Frenkel and Smit, 2001, Hollingsworth and Dror,  
22 2018]. However, MD is limited when interested in *transitions* between two metastable configurations  
23 of a system, such as the folding of a protein, general conformational changes, and chemical reactions.  
24 These meta-stable states are separated by regions of high energy which are unlikely to be sampled  
25 within a reasonable timespan. While machine learning based approximations of the interatomic forces  
26 using neural force fields [Unke et al., 2021] have pushed the boundary in terms of system scale, it  
27 does not address the problem of sampling molecular transition paths directly [Fu et al., 2022].

28 To overcome this issue, prior work in computational and physical chemistry has developed several  
29 methods for the enhanced sampling of molecular transitions such as transition path sampling [Bolhuis  
30 et al., 2002], umbrella sampling [Torrie and Valleau, 1977] and meta-dynamics [Laio and Parrinello,  
31 2002]. Most of these methods speed up the sampling of transition paths by augmenting the MD  
32 simulation with a (learned) bias potential that pushes the system to cross the energy barrier separating  
33 two states. However, due to the large configuration space of molecular trajectories, finding such a  
34 bias potential is in itself a computationally expensive task.

35 To circumvent this problem, prior methods depend on *Collective Variables* (CVs). CVs are functions  
36 of atomic coordinates that have been identified as playing a role within the transition period. Biasing

37 methods rely on these CVs to reduce the complexity of the bias potential by only biasing the system  
 38 along them. Limiting the bias potential to act on the CVs is an intuitive approach since the most  
 39 common reason to sample transition paths, deriving transition dependent quantities such as reaction  
 40 free-energy and reaction rate, are functions of CVs themselves [Bussi and Branduardi, 2015]. See  
 41 fig. 1 for an illustration of the free-energy barrier separating two metastable states of the Alanine  
 42 Dipeptide protein for which the dihedral angles  $\phi$  and  $\psi$  are known to be CVs.

43 However, while sensible, depending on CVs to reduce  
 44 the dimensionality of bias potential search space is  
 45 not always suitable. While some methodological ap-  
 46 proaches are available [Hooft et al., 2021] for smaller  
 47 systems, selecting CVs often relies on prior expert  
 48 knowledge. This limits the applicability of bias po-  
 49 tential enhanced sampling to systems for which this  
 50 information is available. Additionally, when CVs are  
 51 incorrectly chosen, depending the bias potential on  
 52 these CVs might result in errors in determining de-  
 53 pendent quantities [Bolhuis et al., 2000] and incorrect  
 54 interpretation of the transition process.

55 For this purpose, we propose PIPS, a Path Integral  
 56 stochastic optimal control [Kappen, 2005, Kappen  
 57 and Ruiz, 2016] method for Path Sampling of molecu-  
 58 lar transitions. PIPS leverages stochastic optimal con-  
 59 trol theory to train a parameterised bias potential that,  
 60 unlike previous methods from computational chem-  
 61 istry, operates on the entire geometry of the molecule  
 62 instead of depending on predetermined CVs. This  
 63 way, PIPS can be scaled to larger systems.

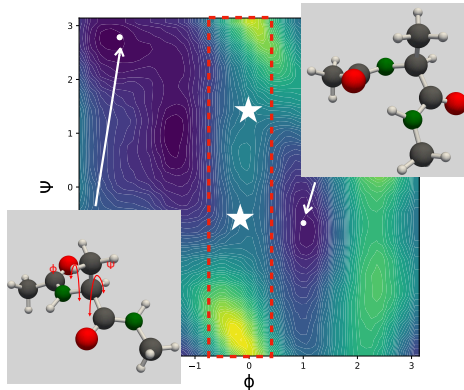

Figure 1: Free-energy surface of Alanine Dipeptide as a function of CV dihedral angles  $\phi$  and  $\psi$  highlighting the high energy barrier separating the two metastable states. White stars indicate saddle points in the high energy barrier where the transition is likely to occur.

64 **Contributions and outline** Our contributions are organised as follows. First, we introduce the  
 65 problem of sampling transition paths in section 2. Second, we formally show in section 3  
 66 the relationship between the problem of sampling transitions paths, the Schrodinger Bridge Problem  
 67 (section 3.1) and Stochastic Optimal Control (SOC) (section 3.3). Following this, we use the gained  
 68 insights regarding SOC in section 4 to propose PIPS; a method based on the PICE algorithm designed  
 69 for sampling molecular transition paths that does not depend on Collective Variables. Lastly, we  
 70 demonstrate the efficacy of PIPS on conformational transitions in three molecular systems of varying  
 71 complexity, namely Alanine Dipeptide, Polyproline, and Chignolin in section 5.

## 72 2 Preliminaries, Problem Setup, and Related Work

### 73 2.1 Molecular Dynamics

74 Given the state of a molecular system  $\mathbf{x}_t := (\mathbf{r}_t, \mathbf{v}_t)$  consisting of positions  $\mathbf{r}_t \in \mathbb{R}^{3n}$  and  
 75 velocities  $\mathbf{v}_t \in \mathbb{R}^{3n}$  at time  $t$  with  $n$  atoms sampled from the Gibbs distribution  $\pi_G(\mathbf{x}_t) =$   
 76  $\exp(-\frac{1}{k_B T} \mathcal{H}(\mathbf{r}_t, \mathbf{v}_t))$ , Molecular Dynamics (MD) describe the time evolution of the state over time.  
 77  $\mathcal{H}$  is known as the Hamiltonian  $\mathcal{H}(\mathbf{r}_t, \mathbf{v}_t) = U(\mathbf{r}_t) + K(\mathbf{v}_t)$ , where  $U(\mathbf{r}_t)$  and  $K(\mathbf{v}_t) = \frac{1}{2} \mathbf{m} \mathbf{v}_t^2$ ,  
 78 with mass  $\mathbf{m}$ , respectively denote the Potential and Kinetic Energy of the system. The potential  
 79 energy of a system is defined by a parameterized sum of pairwise empirical potential functions, such  
 80 as harmonic bonds, angle potentials, inter-molecular electrostatic and Van der Waals potentials.

81 One common approach of integrating the molecular dynamics is Langevin Dynamics [Bussi and  
 82 Parrinello, 2007] which couple the deterministic Newtonian equations of motion with a stochastic  
 83 thermostat that acts like a heat bath. Langevin dynamics obey the following SDEs

$$d\mathbf{r} = \mathbf{v} \cdot dt \quad (1)$$

$$d\mathbf{v} = \frac{-\nabla_{\mathbf{r}} U(\mathbf{r})}{\mathbf{m}} \cdot dt - \gamma \mathbf{v} \cdot dt + \sqrt{2\mathbf{m}\gamma k_B T} d\mathbf{W}, \quad (2)$$

84 where  $k_B$  is the Boltzmann constant,  $T$  the temperature of the heat bath, and  $d\mathbf{W}$  standard Brownian  
 85 Motion.  $\gamma$ , the friction term, couples the dynamics and the heat bath. Following this SDE samples  
 86 samples from the Canonical of NVT ensemble with constant temperature.

87 **2.2 Sampling Transition Path Sampling**

88 By sampling an initial configuration  $\mathbf{x}_0 = (\mathbf{r}_0, \mathbf{v}_0) \sim \pi_G$  and following the MD simulation for  
 89 a fixed amount of time, one can generate trajectories  $\mathbf{x}_{0:\tau} = \{\mathbf{x}_0, \dots, \mathbf{x}_\tau\}$ , of length  $\tau$ . These  
 90 trajectories represent samples from the probability distribution over trajectories given by:

$$\pi(\mathbf{x}_{0:\tau}) = \pi_G(\mathbf{x}_0) \cdot \prod_{t=1}^{\tau} \mathcal{N}(\mathbf{x}_t | \boldsymbol{\mu}_{t-1}, \boldsymbol{\Sigma}_{t-1}), \quad (3)$$

91 with  $\boldsymbol{\mu}_t = (\mathbf{v}_t \cdot dt, \frac{-\nabla_{\mathbf{r}} U(\mathbf{r}_t)}{m} \cdot dt - \gamma \mathbf{v}_t \cdot dt)^T$  and  $\boldsymbol{\Sigma} = \text{diag}(0, 2m\gamma k_B T)$ .

92 However, in the context of sampling transition paths, we are interested in trajectories with a predefined  
 93 an initial and final state. Ie.  $\mathbf{r}_0 \in R \subset \mathbb{R}^{3n}$  and  $\mathbf{r}_\tau \in P \subset \mathbb{R}^{3n}$ . For example,  $R$  can describe the set  
 94 of reactants and  $P$  the set of products of a chemical reaction. Or,  $R$  can be the set of stable native  
 95 states of a protein while  $P$  is the set of folded proteins.

96 We will refer to the distribution over trajectories with restricted initial and target states as the  
 97 *Transition Path* (TP) distribution [Dellago et al., 1998].

98 **Definition 1** (Transition Path (TP) distribution). *Given a set of initial states  $R$ , target states  $P$ ,*  
 99 *potential energy  $U$  and a transition length  $\tau$  the Transition Path (TP) distribution is defined as:*

$$\pi^*(\mathbf{x}_{0:\tau}) = \frac{1}{Z} \mathbf{1}_R(\mathbf{r}_0) \cdot \pi(\mathbf{x}_{0:\tau}) \cdot \mathbf{1}_P(\mathbf{r}_\tau) \quad (4)$$

100 where  $\mathbf{1}_R$  and  $\mathbf{1}_P$  are indicator functions and  $\pi(\mathbf{x}_{0:\tau})$  is defined according to eq. (3).

101 We can naively apply rejection sampling to sample from the TP distribution by sampling a system  
 102  $\mathbf{x}_0 \sim \mathbf{1}_R(\mathbf{r}_0) \cdot \pi_G(\mathbf{x}_0)$ , evolving it for  $\tau$  steps according to the MD in eq. (1) and rejecting it when  
 103  $\mathbf{r}_\tau \notin P$ . Unfortunately, when using standard molecular dynamics, it is very unlikely for any trajectory  
 104 starting in a state  $\mathbf{r}_0 \in R$  to terminate with  $\mathbf{r}_\tau \in P$  due to the two sets of states being separated by  
 105 a high-energy barrier. Ie. for all  $\mathbf{x}_{0:\tau} \sim \pi^*$  some  $\mathbf{x}_t$  has  $U(\mathbf{r}_t) \gg U(\mathbf{r}_0)$ . To be able to obtain a  
 106 representative number of trajectories, one is thus forced to generate a high number of trajectories,  
 107 making naive sampling from the TP distribution computationally very expensive.

108 **2.3 Bias Potential Enhanced Sampling**

109 To solve the problem caused by high-free energy barriers and to sample from the TP distribution  
 110 various enhanced sampling approaches are available. These will be further discussed in the related  
 111 work section. In this work, we will focus on a specific branch of enhanced sampling methods  
 112 called *Bias Potential Enhanced Sampling* (BPES). In BPES approaches, the stochastic dynamics are  
 113 enhanced with a bias potential  $b(\mathbf{r}, \mathbf{v})$  such that when a system  $\mathbf{x}_0 \sim \mathbf{1}_R(\mathbf{r}_0) \cdot \pi_G(\mathbf{x}_0)$  is transformed  
 114 according to the biased dynamics

$$d\mathbf{r} = \mathbf{v} \cdot dt \quad (5)$$

$$d\mathbf{v} = \frac{-\nabla_{\mathbf{r}}(U(\mathbf{r}) + b(\mathbf{r}, \mathbf{v}))}{m} \cdot dt - \gamma \mathbf{v} \cdot dt + \sqrt{2m\gamma k_B T} d\mathbf{W}, \quad (6)$$

115 a trajectory, of length  $\tau$ , always terminates with  $\mathbf{r}_\tau \in P$ .

116 Trajectories sampled by following these bias potential enhanced dynamics are sampled according to  
 117 what we refer to as the Bias Potential enhanced Transition Path (BPTP) distribution

$$\pi^b(\mathbf{x}_{0:\tau}) = \mathbf{1}_R(\mathbf{r}_0) \cdot \pi_G(\mathbf{x}_0) \cdot \prod_{t=1}^{\tau} \mathcal{N}(\mathbf{x}_t | \hat{\boldsymbol{\mu}}_{t-1}, \hat{\boldsymbol{\Sigma}}_{t-1}), \quad (7)$$

118 with  $\hat{\boldsymbol{\mu}}_t = (\mathbf{v}_t \cdot dt, \frac{-\nabla_{\mathbf{r}}(U(\mathbf{r}_t) + b(\mathbf{r}_t, \mathbf{v}_t))}{m} \cdot dt - \gamma \mathbf{v}_t \cdot dt)^T$  and  $\hat{\boldsymbol{\Sigma}} = \text{diag}(0, 2m\gamma k_B T)$ .

119 Finding the bias potential  $b(\mathbf{r}, \mathbf{v})$  such that trajectories sampled from the BPTP distribution are  
 120 distributed according to the TP distribution is referred to as the BPTP problem.

121 **Definition 2** (BPTP problem). *Given a set of initial states  $R$ , target states  $P$  and a Potential*  
 122 *Energy function  $U$ , the BPTP problem describes the task of finding an optimal bias potential  $b^*$  such*  
 123 *that trajectories sampled from the BPTP distribution  $\pi^{b^*}$  are close to samples sampled to the TP*  
 124 *distribution  $\pi^*$ , ie.*

$$b^* = \arg \min_b \mathbb{D}_{\text{KL}}(\pi^b | \pi^*). \quad (8)$$

125 **2.3.1 Related Enhanced Sampling Methods**

126 **CV dependent Enhanced Sampling** Most closely related to our work are the metadynamics [Laio  
 127 and Parrinello, 2002, Bussi and Branduardi, 2015, Barducci et al., 2008] and the Adaptive Biasing  
 128 Force (ABF) methods [Darve and Pohorille, 2001, Comer et al., 2015]. In metadynamics, the bias  
 129 potential is iteratively built as a sum of Gaussians centered at conformational states previously visited  
 130 during the MD simulation. This consecutively pushes the system outwards to regions of higher energy  
 131 not previously visited. Contrarily to metadynamics, ABF does not aim to learn the bias potential  
 132  $b(\mathbf{r}, \mathbf{v})$ , but instead aims to control the system through the *bias force*  $\mathbf{b}(\mathbf{r}, \mathbf{v}) = \nabla_{\mathbf{r}} b(\mathbf{r}, \mathbf{v}) \in \mathbb{R}^{3n}$ .  
 133 The intuition behind ABF is to learn a bias force that cancels out the deterministic force from  
 134 the molecular potential. As a result, the only remaining driving force is the stochastic Langevin  
 135 thermostat which is not affected by the high energy barriers. Other approaches to sampling transition  
 136 paths using a bias potential include umbrella sampling Torrie and Valleau [1977], hyper-MD [Voter,  
 137 1997], the Wang-Landau method [Wang and Landau, 2001] and various less commonly applied  
 138 others [Sprik and Ciccotti, 1998, Grubmüller, 1995, Huber et al., 1994, Carter et al., 1989]. All these  
 139 methods depend on dimensionality reduction steps using CVs while our proposed method does not.

140 **CV free Enhanced Sampling** In addition to the CV dependent methods a different family of MCMC  
 141 based approaches for direct sampling from the TP distributions is available. These methods, such  
 142 as Transition Path Sampling [Dellago et al., 1998, Bolhuis et al., 2002] and Nudge Elastic Band  
 143 sampling [Henkelman et al., 2000], generally do not use a bias potential or CVs.

144 Recently, several machine learning solutions for the BPTP and related problems have been proposed.  
 145 For example, Das et al. [2021] use Reinforcement Learning to sample from the TP distribution under  
 146 Brownian dynamics, Schneider et al. [2017] consider the modelling of the free-energy surface using  
 147 neural networks, and Sultan et al. [2018] use neural networks as generalizable CVs.

148 **3 Sampling Transition Paths using Stochastic Optimal Control theory**

149 In this section we will discuss the relationship between the BPTP problem and two topics from the  
 150 machine learning literature; the Schrodinger Bridge problem and Stochastic Optimal Control.

151 **3.1 The BPTP problem is a Schrodinger Bridge Problem**

152 First introduced by Schrodinger [Schrödinger, 1931, 1932], the Schrodinger Bridge (SB) problem  
 153 studies the transition between two distributions over time under some fixed drift and diffusion  
 154 components. Formally, the SP problem is defined as

155 **Definition 3** (Schrodinger Bridge (SB) problem). *Given a reference distribution  $\pi(\mathbf{x}_{0:\tau})$  over*  
 156 *trajectories with predefined marginals  $\pi_0$  and  $\pi_\tau$ , the Schrodinger Bridge (SB) Problem aims to find*  
 157 *an alternative distribution  $\hat{\pi}(\mathbf{x}_{0:\tau})$  such that*

$$\hat{\pi}^*(\mathbf{x}_{0:\tau}) := \arg \min_{\hat{\pi}(\mathbf{x}_{0:\tau}) \in \mathcal{D}(\pi_0, \pi_\tau)} \mathbb{D}_{\text{KL}}(\hat{\pi}(\mathbf{x}_{0:\tau}) \| \pi(\mathbf{x}_{0:\tau})) \quad (9)$$

158 where  $\mathcal{D}(\pi_0, \pi_\tau)$  is the space of path measures with marginals  $\pi_0$  and  $\pi_\tau$ .

159 Recently, machine learning approaches for parameterizing this alternative distribution  $\hat{\pi}$  to approxi-  
 160 mate the reference distribution  $\pi$  have received attention [Vargas et al., 2021, De Bortoli et al., 2021].  
 161 In the following theorem, we show that these approaches also provide a solution to the BPTP problem  
 162 when the correct marginal distributions are specified.

163 **Theorem 3.1** (BPTP problem is a SB problem). *Let  $b$  be the set of functions such that  $\pi_0 =$*   
 164  *$\pi_G(\mathbf{x}_0) \cdot \mathbf{1}_R(\mathbf{r}_0)$  and  $\pi_\tau = \pi_G(\mathbf{x}_\tau) \cdot \mathbf{1}_R(\mathbf{r}_\tau)$ , we have that a solution to the SB problem with*  
 165 *reference distribution  $\pi^*$  is also a solution to the BPTP problem, ie.*

$$\arg \min_b \mathbb{D}_{\text{KL}}(\pi^b | \pi^*) = \arg \min_{\pi^b \in \mathcal{D}(\pi_0, \pi_\tau)} \mathbb{D}_{\text{KL}}(\pi^b | \pi^*) \quad (10)$$

166 *Proof.* This follows from the definition of the BPTP and SB problems. □

167 Following this theorem, we can use proposed solutions for solving the SBP to solve the BPTP  
 168 problem using a bias potential. In this work, we will specifically focus on Stochastic Optimal Control  
 169 theory, which has been shown to solve the SBP in [Chen et al., 2016].

170 **3.2 Background: Stochastic Optimal Control**

171 Given an arbitrarily controlled dynamical system

$$d\mathbf{x}_t = \mathbf{f}(\mathbf{x}_t) dt + \mathbf{G}(\mathbf{x}_t) \cdot (\mathbf{u}(\mathbf{x}_t) dt + d\mathbf{W}), \quad \mathbf{x}_0 \sim \pi_0, \quad (11)$$

172 where  $\mathbf{f} : \mathbb{R}^d \times \mathbb{R}^+ \rightarrow \mathbb{R}^d$  and  $\mathbf{G} : \mathbb{R}^d \times \mathbb{R}^+ \rightarrow \mathbb{R}^{d \times d}$  are deterministic functions representing the  
173 drift and volatility of the system and  $d\mathbf{W}$  is Brownian Motion with variance  $\nu$ , Stochastic Optimal  
174 Control theory aims to find a policy  $\mathbf{u}(\mathbf{x}_t)$  that minimizes some expected cost  $C$  over the trajectories:

$$\mathbf{u}^* = \arg \min_{\mathbf{u}} \mathbb{E}_{\mathbf{x}_{0:\tau} \sim \pi_u} [C(\mathbf{x}_{0:\tau})] \quad (12)$$

175 Here  $\pi_u$  represents the distribution over trajectories similar to eq. (7) with  $\boldsymbol{\mu}_t = \mathbf{x}_t + \mathbf{f}(\mathbf{x}_t, t) dt +$   
176  $\mathbf{G}(\mathbf{x}_t)(\mathbf{u}(\mathbf{x}_t) dt)$  and  $\Sigma_t = \mathbf{G}(\mathbf{x}_t)^T \nu \mathbf{G}(\mathbf{x}_t)$ .

177 In this work we will specifically rely on a branch of SOC called Path Integral Control (PISOC), first  
178 introduced by Kappen [2007]. In PISOC the cost of a trajectory is defined as

$$C(\mathbf{x}_{0:\tau}) = \frac{1}{\lambda} \left( \varphi(\mathbf{x}_\tau) + \sum_{t=0}^{\tau-1} \frac{1}{2} \mathbf{u}(\mathbf{x}_t)^T \mathbf{R} \mathbf{u}(\mathbf{x}_t) + \mathbf{u}(\mathbf{x}_t)^T \mathbf{R} \boldsymbol{\varepsilon}_t \right) \quad (13)$$

179 where  $\boldsymbol{\varepsilon}_t = \mathbf{G}^{-1}(\mathbf{x}_t)(d\mathbf{x} - \mathbf{f}(\mathbf{x}_t) dt) - \mathbf{u}(\mathbf{x}_t)$ ,  $\varphi$  denotes the terminal cost,  $\lambda$  is a constant and  $\mathbf{R}$  is  
180 the cost of taking action  $\mathbf{u}$  in the current state and is given as a weight matrix for a quadratic control  
181 cost. To clarify,  $\boldsymbol{\varepsilon}_t \sim d\mathbf{W}$  is the noise introduced into the trajectories by the Langevin thermostat.

182 **3.3 SOC solves the BPTP problem**

183 We can see that SOC dynamical system (eq. (11)) is similar to the dynamics of the BPTP distribution  
184 (eq. (5)). In fact, as we will see next, with a properly defined  $\varphi$ , minimizing the trajectory cost  
185 (eq. (13)) results in finding a control  $\mathbf{u}$  that solves the BPTP problem.

186 **Theorem 3.2** (SOC solves the BPTP problem). *Given  $\mathbf{x}_t = (\mathbf{r}_t, \mathbf{v}_t)^T$ ,  $\mathbf{f}(\mathbf{x}_t) = (\mathbf{v}_t, \frac{-\nabla_{\mathbf{r}_t} U(\mathbf{r}_t)}{m} -$   
187  $\gamma \mathbf{v}_t)^T$ ,  $\mathbf{G}(\mathbf{x}_t) = (\mathbf{0}_{3n}, \mathbb{I}_{3n})^T$ ,  $\mathbf{u}(\mathbf{x}_t) = \frac{-\nabla_{\mathbf{r}_t} b(\mathbf{r}_t, \mathbf{v}_t)}{m}$ ,  $\nu = \sqrt{2m\gamma k_B T}$ , and  $\pi_0 = \pi_G$ , such that the  
188 SOC dynamics (eq. (11)) describe the dynamics of the BPTP distribution  $\pi^b$  (eq. (5)).*

189 *If we define  $\varphi(\mathbf{x}_\tau) = -\lambda \log(\mathbf{1}_P(\mathbf{r}_\tau))$ ,  $\mathbf{R} = \lambda \nu^{-1} = \lambda(2m\gamma k_B T)^{-1}$  and assume  $\mathbf{r}_0 \in R$ , we have*

$$\arg \min_b \mathbb{E}_{\mathbf{x}_{0:\tau} \sim \pi^b} [C(\mathbf{x}_{0:\tau})] = \arg \min_b \mathbb{D}_{\text{KL}}(\pi^b | \pi^*), \quad (14)$$

190 *where  $\pi^*$  is the TP distribution.*

191 *Proof.* See appendix A. The proof relates  $\pi^b$  and  $\pi^0$  using Girsanov's theorem to rewrite the expecta-  
192 tion over cost  $C$  as the summation of the terminal cost and a KL divergence.  $\square$

193 **4 PIPS: Path Integral SOC for Path Sampling**

194 Previously, we have seen how SOC solutions are also solutions for the BPTP problem. Using this  
195 insight, we will design a SOC approach to finding a parameterized bias potential  $b_\theta$ , that solves the  
196 BPTP problem. We refer to this method as PIPS: Path Integral Path Sampling. PIPS is an adaptation  
197 of the Path Integral Cross Entropy (PICE) [Kappen and Ruiz, 2016] method to the setting of sampling  
198 molecular transition paths where we have a single initial  $R = \{\mathbf{r}_0^*\}$  and target  $P = \{\mathbf{r}_\tau^*\}$  system.

199 **Background: Path Integral Cross Entropy** Kappen and Ruiz [2016] introduced the Path Integral  
200 Cross Entropy (PICE) method for solving Equation (12). The PICE method derives an explicit  
201 expression for the distribution  $\pi_{\mathbf{u}^*}$  under optimal control  $\mathbf{u}^*$  when  $\lambda = \nu \mathbf{R}$  given by:

$$\pi^{\mathbf{u}^*} = \frac{1}{\eta(\mathbf{x}, t)} \pi^{\mathbf{u}}(\mathbf{x}_{0:\tau}) \exp(-C(\mathbf{x}_{0:\tau})) \quad (15)$$

202 where  $\eta(\tau) = \mathbb{E}_{\mathbf{x}_{0:\tau} \sim \pi^0} [\exp(-\frac{1}{\lambda} \varphi(\mathbf{x}_\tau))]$  is the normalization constant. This establishes the optimal  
203 distribution  $\pi^{\mathbf{u}^*}$  as a reweighing of any distribution induced by an arbitrary control  $\mathbf{u}$ .

204 PICE, subsequently, achieves this by minimizing the KL-divergence between the optimal controlled  
 205 distribution  $\pi^{\mathbf{u}^*}$  and a parameterized distribution  $\pi^{\mathbf{u}_\theta}$  using gradient descent as follows:

$$\frac{\partial \mathbb{D}_{\text{KL}}(\pi^{\mathbf{u}^*} | \pi^{\mathbf{u}_\theta})}{\partial \theta} = -\frac{1}{\eta} \mathbb{E}_{\mathbf{x}_{0:\tau} \sim \pi_{\mathbf{u}_\theta}} [\exp(-C(\mathbf{x}_{0:\tau}, \mathbf{u}_\theta)) \sum_{t=0}^{\tau} (\mathbf{R}\varepsilon_t \cdot \frac{\partial \mathbf{u}_\theta}{\partial \theta})] \quad (16)$$

206 Similar to the optimal control in eq. (15), the gradient used to minimize the KL-divergence is found  
 207 by reweighing for each sampled trajectory,  $\mathbf{x}_{0:\tau}$ , the gradient of the control policy  $\mathbf{u}_\theta$  by the cost of  
 208 the trajectory. See Algorithm 1 in the appendix for an algorithmic description of PICE.

#### 209 4.1 Adaptations to PICE

210 In this section we will specify the adaptations made to the PICE algorithm to apply it to solve the  
 211 BPTP problem for the molecular transition path setting.

212 **Smoothing the loss function** As shown in the previous section, when using the target loss  $\varphi(\mathbf{x}_\tau) =$   
 213  $-\lambda \log(\mathbf{1}_P(\mathbf{r}_\tau))$ , SOC solves the BPTP problem. However, while optimal, this loss function is hard  
 214 to use in the PICE optimization task as it is infinite for all  $\mathbf{x}_{0:\tau}$  where  $\mathbf{r}_\tau \neq \mathbf{r}_\tau^*$ . As such, we instead  
 215 use a smoothed version  $\varphi(\mathbf{r}_t) = \exp \sum_{i,j}^n (d_{ij}(\mathbf{r}_t) - d_{ij}(\mathbf{r}_\tau))^2$  where  $d_{ij}(\mathbf{r}_t) = \|(\mathbf{r}_t)_i - (\mathbf{r}_t)_j\|_2^2$ .  
 216 This exponentiated pairwise distance between the atoms is a commonly used distance metric [Shi  
 217 et al., 2021] that is invariant to rotations and translations of the molecular system.

218 **Architectural considerations** The learnable component of PIPS is the bias potential  $b$ . However,  
 219 as the BPTP dynamics show in eq. (5), instead of using the bias potential directly, MD depends on  
 220 the *bias force* — the gradient of the bias potential  $\mathbf{b}(\mathbf{r}, \mathbf{v}) = \nabla_{\mathbf{r}} b(\mathbf{r}, \mathbf{v}) \in \mathbb{R}^{3n}$ . This consideration  
 221 allows for two different modelling approaches for the bias force similar to the distinction between  
 222 metadynamics and adaptive bias force discussed in section 2.3.1. One can either parameterise the bias  
 223 force directly  $\mathbf{b}(\mathbf{r}, \mathbf{v}) = \mathbf{b}_\theta(\mathbf{r}, \mathbf{v})$  or, alternatively, model  $b_\theta(\mathbf{r}, \mathbf{v})$  the bias potential and calculate  
 224 the corresponding bias force by backpropagation,  $\mathbf{b}(\mathbf{r}, \mathbf{v}) = \nabla_{\mathbf{r}} b_\theta(\mathbf{r}, \mathbf{v})$ . The advantage of the latter  
 225 is that the forces are conservative by construction.

226 In section 5.1 we will compare both these modelling approaches. In both cases we will use a MLP  
 227 with ReLU activation for either the parameterized bias force or bias potential. Alternatively,  $\mathbf{b}_\theta$  or  $b_\theta$   
 228 could be implemented using recent advances in physics inspired equivariant neural networks [Cohen  
 229 and Welling, 2016, Satorras et al., 2021] that take into account the SE(3) symmetry of the system.  
 230 We provide details for training the control network  $\mathbf{u}_\theta$  in Appendix B.

231 **Integration with MD simulation frameworks** To efficiently calculate the Potential  $U(\mathbf{x})$  and  
 232 integrate the MD in eq. (1), various optimized simulation frameworks are available. In our work  
 233 we use the OpenMM framework [Eastman et al., 2017]. The bias force  $\mathbf{b}(\mathbf{r}, \mathbf{v})$  is integrated in  
 234 OpenMM as a *custom external force*. Implementing the control this way allows us to use the

|                           | $\tau$<br>fs | Temp.<br>K | EPD ( $\downarrow$ )<br>nm $\times 10^{-3}$ | THP ( $\uparrow$ )<br>% | ETP ( $\downarrow$ )<br>kJ mol $^{-1}$ |
|---------------------------|--------------|------------|---------------------------------------------|-------------------------|----------------------------------------|
| Bias Force Prediction     | 500          | 300        | 2.07                                        | 41.1 %                  | 0.68                                   |
| Bias Potential Prediction | 500          | 300        | 1.25                                        | 89.2 %                  | -5.21                                  |
| MD w. fixed timescale     | 500          | 300        | 7.92                                        | 0%                      | -                                      |
|                           | 500          | 1500       | 7.47                                        | 0%                      | -                                      |
|                           | 500          | 4500       | 6.33                                        | 0%                      | -                                      |
|                           | 500          | 9000       | 6.82                                        | 1.7 %                   | 1019.83                                |
| MD w/ fixed timescale     | 34810        | 1500       | 1.88                                        | 100%                    | 551.51                                 |
|                           | 48683        | 4500       | 2.01                                        | 100%                    | 1647.35                                |

Table 1: Benchmark scores for the proposed method and extended MD baselines. From-left-to-right: Time-horizon  $\tau$  representing the trajectory length (note that we take one policy step every 1 fs), simulation temperature, Expected Pairwise distance (EPD), Target Hit Percentage (THP), and Energy Transition Point (ETP). ETP can only be calculate when a trajectory reaches the target. All metrics are averaged over 1000 trajectories except for MD w/ fixed timescale which is ran only for 10 trajectories.

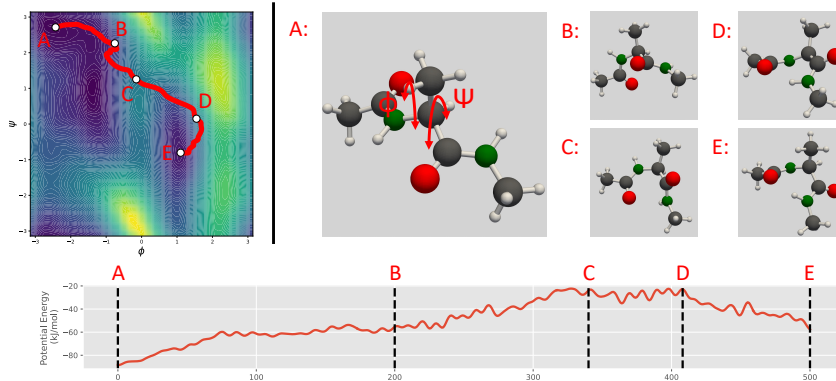

Figure 2: Visualization of a trajectory sampled with PIPS. *Left*: The sampled trajectory projected on the free energy landscape of AD as a function of two CVs *Right*: Conformations along the sampled trajectory: A) starting conformation showing the CV dihedral angles, B-D) intermediate conformations with C being the highest energy point on the trajectory, and E) final conformation, which closely aligns with the target conformation. *Bottom*: Potential energy during transition.

235 optimized configuration capabilities of OpenMM, such as forcefield definitions (the potential function  
 236 description) and integrators (for the time-discretization of our dynamics).

237 One downside of using OpenMM for integrating the MD is that it does not provide access to the noise  
 238  $\varepsilon_t \sim \sqrt{2m\gamma k_B T} d\mathbf{W}$  used in the Langevin thermostat that is needed to calculate the update to the  
 239 policy weights. To circumvent this, we instead sample an additional exploratory noise term  $\hat{\varepsilon}_t \sim d\mathbf{W}$   
 240 with variance  $\hat{\nu}$  that is used to optimize the policy and assume the Langevin noise to be part of the  
 241 drift of the system  $\mathbf{f}$ . While this loses the formal guarantees presented in section 3, we found this to  
 242 be experimentally stable and provide close to optimal trajectory paths (as shown in section 5.1).

## 243 5 Experiments

244 We evaluate PIPS using three molecular systems, namely (i) **Alanine Dipeptide**, to compare PIPS  
 245 to CV free and CV dependent baselines, (ii) **Polyproline**, to evaluate PIPS as a method to select  
 246 candidate CVs, and (iii) **Chignolin**, as a use-case of PIPS scalability to proteins without known CVs.

247 We report the molecule specific OpenMM configuration as well as the used neural network architecture  
 248 to learn the bias potential/force in appendix C. Generally, we run our simulations at 300 K and use  
 249 6 layer MLP with the width of the layers dependent on the number of atoms in the molecule under  
 250 consideration. Our code, including a full stand-alone notebook re-implementation, is available here:  
 251 <https://github.com/pips4anonymous/pips-anonymous>.

### 252 5.1 Alanine Dipeptide

253 In this section we evaluate PIPS on the extensively studied Alanine Dipeptide (AD) molecule. AD  
 254 is a relatively small protein for which the CVs (two dihedral angles  $\phi$  and  $\psi$ ) are readily available  
 255 and is therefore well suited for the development of enhanced sampling methods that require CVs.  
 256 While PIPS does not use the CVs during training, their availability does come in useful to evaluate  
 257 the sampled transition. The transition evaluated here have a 500 fs time horizon.

#### 258 5.1.1 Quantitative comparison to CV free baselines

259 As discussed, our work is the first to consider CV free sampling of transition paths at this scale and  
 260 as such other baselines or metrics are not available. In table 1 we therefore evaluate PIPS using  
 261 MD simulations with extended time-horizon and increased system temperature as baselines and  
 262 introduce three metrics to evaluate the quality of the transition paths. (i) *Expected Pairwise Distance*  
 263 (EPD) measures the euclidean distance between the final conformation in the trajectory and the  
 264 target conformation, reflecting the goal of the transition to end in the target state, (ii) *Target Hit*  
 265 *Percentage* (THP) assures that the final configuration is also close in terms of CVs by measuring the  
 266 percentage of trajectories correctly transforming these CVs, and (iii) *Energy Transition Point* (ETP)  
 267 which evaluates the capacity of each method to find transition paths that cross the high-energy barrier

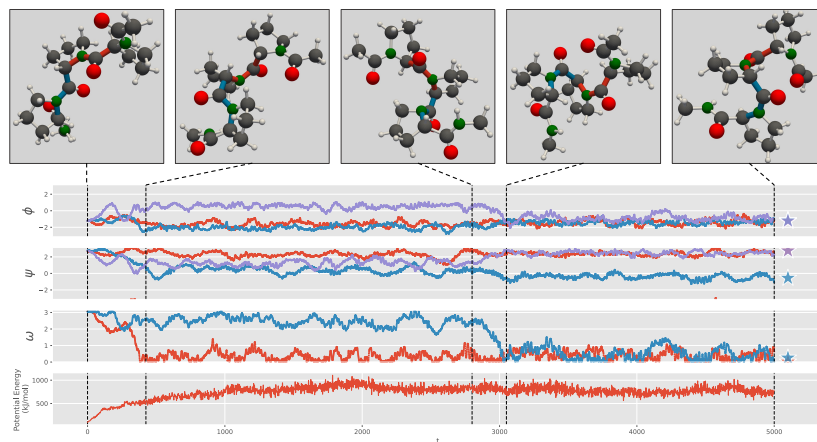

Figure 3: Visualization of the Polyproline transformation from PP-II to PP-I. *From-top-to-bottom* 5 stages of the transition,  $\psi$ ,  $\phi$ ,  $\omega$  candidate CVs, and Potential Energy. For the candidate CVs multiple instances of the same dihedral angles can be found in a single molecule. Stars indicate target candidate CV states. Colored bonds represent the bonds involved in the  $\omega$  CV.

268 at a low point by taking the maximum potential energy of the molecule along the trajectory. A good  
 269 trajectory will be one that passes through the minimal high-energy barrier and ETP aims to measure  
 270 this. We provide more details in Appendix C.2.1.

271 **Results:** We find that the trajectories generated by both the policy networks outperform the MD  
 272 baselines, but the more physics-aligned potential predicting policy performs best under our metrics.  
 273 This policy network consistently reaches the target conformation both in terms of full geometry and  
 274 the CVs orientation. Furthermore, our policy network generates these trajectories in a significantly  
 275 shorter time than temperature enhanced MD simulations without a fixed timescale. When we do limit  
 276 MD to run for the same timescale as the proposed method, we found that, in contrast to the proposed  
 277 method, temperature enhanced MD simulations are unable to generate successful trajectories. We  
 278 will use the bias potential predicting policy in the following.

### 279 5.1.2 Qualitative comparison to CV dependent metadynamics

280 In fig. 2 we visualise an AD transition sampled by PIPS using the bias potential predicting policy. In  
 281 the top left, we overlay the transition projected onto CV space on the free-energy surface generated  
 282 using metadynamics. The free-energy surface thus serves as a ground-truth generated using a method  
 283 that requires extensive domain knowledge. We aim to show that the trajectory sampled using PIPS  
 284 aligns with the saddle points of the metadynamics free-energy surface.

285 **Results:** The trajectory in Figure 2 demonstrates that the bias potential control policy transforms the  
 286 molecule from the initial position (A) to the final position (E) by transitioning over the same saddle  
 287 point in the free-energy barrier found by metadynamics (C). This shows that the trajectory follows  
 288 the same transition in CV space as metadynamics despite, contrarily to metadynamics, not being  
 289 biased to do so. The potential energy goes up during the transition until it reaches the lowest point of  
 290 the energy barrier (C) and consecutively settles down in its new low-energy state.

## 291 5.2 Polyproline Helix

292 Second, we consider a Polyproline trimer with 3 proline residues. Polyproline is a more complex  
 293 protein than AD and as such its CVs are less well understood. We therefore use this protein to  
 294 determine if PIPS biases the system along the correct CVs when a collection of candidate CVs are  
 295 available. Specifically, we consider the peptide bond orientation ( $\omega$ ) and two backbone dihedral  
 296 angles ( $\phi$  and  $\psi$ ). As initial and target state we provide a single example of Polyprolines PP-I form  
 297 (with cis-isomer peptide bonds) and PP-II form (with trans-isomer peptide bonds) respectively. For  
 298 this transition it is known that the CV of interest are the peptide bond orientation. Additionally, to  
 299 study PIPS resilience to target misspecification, the supplied PP-II form also contains a transformation  
 300 in one of the  $\psi$ -dihedral angles which is irrelevant to the transition. The transition time is 5000 fs.



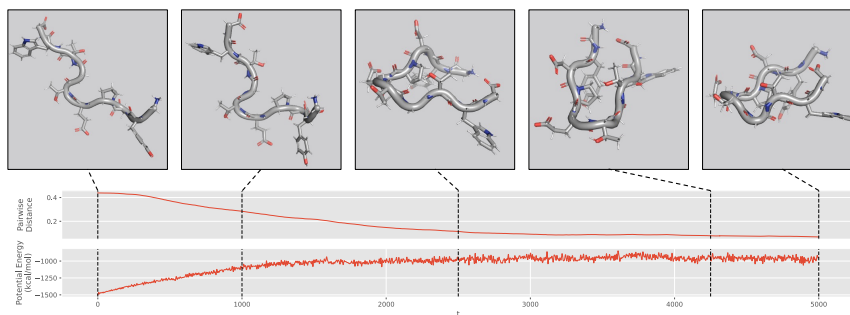

Figure 4: Visualization of the Chignolin folding process. *Top*: 5 stages of the folding process, *Middle*: Pairwise distance wrt to the target conformation of the molecule, *Bottom*: Potential Energy.

301 **Results:** We visualize the transformation of the three collective variables ( $\omega$ ,  $\phi$ ,  $\psi$ ) as well as the  
 302 corresponding potential energy of the conformation in Figure 3 for a sampled transition path. We  
 303 observe that the transition correctly occurs along the  $\omega$  CV going from  $180^\circ$  to  $0^\circ$ . This suggest  
 304 that PIPS could be used for testing the validity of candidate CVs. However, we also observe that in  
 305 addition to the peptide bonds PIPS also biases the system along one of the  $\psi$ -dihedral angles due to  
 306 the introduced target misspecification. As the small fluctuations are to be expected when sampling  
 307 a single target from the Boltzmann distribution, alternative methods for specifying the target state  
 308 should be explored in future work.

### 309 5.3 Chignolin

310 Lastly, we consider the small  $\beta$ -hairpin protein Chignolin. Chignolin was artificially constructed to  
 311 study protein folding mechanisms [Honda et al., 2004, Seibert et al., 2005]. Due to its small size, its  
 312 folding process is easier to study than larger scale proteins while being similar enough to shed light  
 313 on this complex process. In contrast to Alanine Dipeptide and Polyproline, there is no agreement on  
 314 the transition mechanism describing the folding of Chignolin. Both the CVs involved [Satoh et al.,  
 315 2006, Passignoni and Camilloni, 2021], as well as the sequence of steps [Harada and Kitao, 2011, Satoh  
 316 et al., 2006, Suenaga et al., 2007, Enemark et al., 2012] describing the folding process have multiple  
 317 different interpretations. Chignolin thus serves as a usecase study for scaling PIPS beyond traditional  
 318 CV-based approaches to solve the BPTP-problem. We sample transition paths between the folded  
 319 and unfolded state of the Chignolin protein using a total time horizon of 5000 fs. Note that the typical  
 320 folding time of Chignolin is recorded to be  $0.6 \mu\text{s}$  [Lindorff-Larsen et al., 2011].

321 **Results:** In Figure 4, we visualize the transition of Chignolin at 5 different timesteps during the  
 322 transition path. We observe that to transition the protein from its low energy unfolded state to  
 323 the folded conformation, the proposed method guides the protein into a region of higher energy.  
 324 This increase is initially more steep ( $0 \rightarrow 1500$ ) than in the later stages. Additionally, most of the  
 325 finer-grained folding ( $2500 \rightarrow 4000$ ) occurs with a high potential energy before settling into the lower-  
 326 energy folded state. We notice that for the restricted folding time we use in our experiments (5000 fs  
 327 vs  $0.6 \mu\text{s}$ ), the molecule does not end at the final configuration but reaches close to it as shown by the  
 328 plot on pairwise distance. Furthermore, the learned policy network is able to transition through the  
 329 high energy transition barrier in this restricted time. We do not encounter this for molecules with a  
 330 shorter natural transition time (as illustrated by the potential energy of Alanine Dipeptide in fig. 2).

## 331 6 Discussion

332 In this work, we have proposed PIPS—a path integral stochastic optimal control method for the  
 333 problem of molecular sampling transition paths using a bias potential. In contrast to prior work, PIPS  
 334 does not require prespecifying CVs along which the system should be biased. We show the benefits  
 335 of PIPS using three different molecular systems of varying sizes. In passing, we gave an introductory  
 336 description of the problem of sampling transition paths and related it to the stochastic optimal control  
 337 and the Schrodinger bridge problem. With this, we hope to not only have motivated our own work but  
 338 also provided a starting point for future work consideration of this important problem by the machine  
 339 learning community. For future work, we specifically note that the use of PIPS for CV discovery and  
 340 the exploration of other approaches for specifying the target state, possibly using an ensemble of  
 341 samples, is a promising direction as exemplified by our Polyproline experiment.

## 342 **References**

- 343 Daan Frenkel and Berend Smit. *Understanding molecular simulation: from algorithms to applications*,  
344 volume 1. Elsevier, 2001.
- 345 Scott A. Hollingsworth and Ron O. Dror. [Molecular Dynamics Simulation for All](#). *Neuron*, 99(6):  
346 1129–1143, September 2018.
- 347 Oliver T. Unke, Stefan Chmiela, Huziel E. Sauceda, Michael Gastegger, Igor Poltavsky, Kristof T.  
348 Schütt, Alexandre Tkatchenko, and Klaus-Robert Müller. [Machine Learning Force Fields](#). *Chemical Reviews*, 121(16):10142–10186, August 2021.
- 350 Xiang Fu, Zhenghao Wu, Wujie Wang, Tian Xie, Sinan Ketten, Rafael Gomez-Bombarelli, and Tommi  
351 Jaakkola. [Forces are not enough: Benchmark and critical evaluation for machine learning force  
352 fields with molecular simulations](#). *arXiv preprint arXiv:2210.07237*, 2022.
- 353 Peter G Bolhuis, David Chandler, Christoph Dellago, and Phillip L Geissler. [Transition path sampling:  
354 Throwing ropes over rough mountain passes, in the dark](#). *Annual review of physical chemistry*, 53  
355 (1):291–318, 2002.
- 356 Glenn M Torrie and John P Valleau. [Nonphysical sampling distributions in Monte Carlo free-energy  
357 estimation: Umbrella sampling](#). *Journal of Computational Physics*, 23(2):187–199, 1977.
- 358 Alessandro Laio and Michele Parrinello. [Escaping free-energy minima](#). *Proceedings of the National  
359 Academy of Sciences*, 99(20):12562–12566, October 2002.
- 360 Giovanni Bussi and Davide Branduardi. [Free-Energy Calculations with Metadynamics: Theory and  
361 Practice](#). In Abby L. Parrill and Kenny B. Lipkowitz, editors, *Reviews in Computational Chemistry*,  
362 pages 1–49. John Wiley & Sons, Inc, May 2015.
- 363 Ferry Hooft, Alberto Pérez de Alba Ortíz, and Bernd Ensing. [Discovering collective variables of  
364 molecular transitions via genetic algorithms and neural networks](#). *Journal of chemical theory and  
365 computation*, 17(4):2294–2306, 2021.
- 366 Peter G. Bolhuis, Christoph Dellago, and David Chandler. [Reaction coordinates of biomolecular  
367 isomerization](#). *Proceedings of the National Academy of Sciences*, 97(11):5877–5882, May 2000.
- 368 Hilbert J Kappen. [Path integrals and symmetry breaking for optimal control theory](#). *Journal of  
369 statistical mechanics: theory and experiment*, 2005(11):P11011, 2005.
- 370 Hilbert Johan Kappen and Hans Christian Ruiz. [Adaptive importance sampling for control and  
371 inference](#). *Journal of Statistical Physics*, 162(5):1244–1266, 2016.
- 372 Giovanni Bussi and Michele Parrinello. [Accurate sampling using Langevin dynamics](#). *Physical  
373 Review E*, 75(5):056707, May 2007.
- 374 Christoph Dellago, Peter G. Bolhuis, Félix S. Csajka, and David Chandler. [Transition path sampling  
375 and the calculation of rate constants](#). *The Journal of Chemical Physics*, 108(5):1964–1977,  
376 February 1998.
- 377 Alessandro Barducci, Giovanni Bussi, and Michele Parrinello. [Well-Tempered Metadynamics: A  
378 Smoothly Converging and Tunable Free-Energy Method](#). *Physical Review Letters*, 100(2):020603,  
379 January 2008.
- 380 Eric Darve and Andrew Pohorille. [Calculating free energies using average force](#). *The Journal of  
381 Chemical Physics*, 115(20):9169–9183, November 2001.
- 382 Jeffrey Comer, James C. Gumbart, Jérôme Hémin, Tony Lelièvre, Andrew Pohorille, and Christophe  
383 Chipot. [The Adaptive Biasing Force Method: Everything You Always Wanted To Know but Were  
384 Afraid To Ask](#). *The Journal of Physical Chemistry B*, 119(3):1129–1151, January 2015.
- 385 Arthur F. Voter. [A method for accelerating the molecular dynamics simulation of infrequent events](#).  
386 *The Journal of Chemical Physics*, 106(11):4665–4677, March 1997.

- 387 Fugao Wang and D. P. Landau. [Efficient, Multiple-Range Random Walk Algorithm to Calculate the](#)  
388 [Density of States](#). *Physical Review Letters*, 86(10):2050–2053, March 2001.
- 389 Michiel Sprik and Giovanni Ciccotti. [Free energy from constrained molecular dynamics](#). *The Journal*  
390 [of Chemical Physics](#), 109(18):7737–7744, November 1998.
- 391 Helmut Grubmüller. [Predicting slow structural transitions in macromolecular systems: Conforma-](#)  
392 [tional flooding](#). *Physical Review E*, 52(3):2893–2906, September 1995.
- 393 Thomas Huber, Andrew E. Torda, and Wilfred F. Van Gunsteren. [Local elevation: A method for](#)  
394 [improving the searching properties of molecular dynamics simulation](#). *Journal of Computer-Aided*  
395 [Molecular Design](#), 8(6):695–708, December 1994.
- 396 E.A. Carter, Giovanni Ciccotti, James T. Hynes, and Raymond Kapral. [Constrained reaction coordi-](#)  
397 [nate dynamics for the simulation of rare events](#). *Chemical Physics Letters*, 156(5):472–477, April  
398 1989.
- 399 Graeme Henkelman, Blas P. Uberuaga, and Hannes Jónsson. [A climbing image nudged elastic band](#)  
400 [method for finding saddle points and minimum energy paths](#). *The Journal of Chemical Physics*,  
401 113(22):9901–9904, December 2000.
- 402 Avishek Das, Dominic C Rose, Juan P Garrahan, and David T Limmer. [Reinforcement learning of](#)  
403 [rare diffusive dynamics](#). *The Journal of Chemical Physics*, 155(13):134105, 2021.
- 404 Elia Schneider, Luke Dai, Robert Q. Topper, Christof Drechsel-Grau, and Mark E. Tuckerman.  
405 [Stochastic Neural Network Approach for Learning High-Dimensional Free Energy Surfaces](#).  
406 *Physical Review Letters*, 119(15):150601, October 2017.
- 407 Mohammad M. Sultan, Hannah K. Wayment-Steele, and Vijay S. Pande. [Transferable Neural Net-](#)  
408 [works for Enhanced Sampling of Protein Dynamics](#). *Journal of Chemical Theory and Computation*,  
409 14(4):1887–1894, April 2018.
- 410 Erwin Schrödinger. *Über die umkehrung der naturgesetze*. Verlag der Akademie der Wissenschaften  
411 in Kommission bei Walter De Gruyter u . . . , 1931.
- 412 Erwin Schrödinger. [Sur la théorie relativiste de l’électron et l’interprétation de la mécanique quantique](#).  
413 [In Annales de l’institut Henri Poincaré](#), volume 2, pages 269–310, 1932.
- 414 Francisco Vargas, Pierre Thodoroff, Austen Lamacraft, and Neil Lawrence. [Solving schrödinger](#)  
415 [bridges via maximum likelihood](#). *Entropy*, 23(9):1134, 2021.
- 416 Valentin De Bortoli, James Thornton, Jeremy Heng, and Arnaud Doucet. [Diffusion Schrödinger](#)  
417 [bridge with applications to score-based generative modeling](#). *Advances in Neural Information*  
418 [Processing Systems](#), 34, 2021.
- 419 Yongxin Chen, Tryphon T Georgiou, and Michele Pavon. [On the relation between optimal transport](#)  
420 [and Schrödinger bridges: A stochastic control viewpoint](#). *Journal of Optimization Theory and*  
421 [Applications](#), 169(2):671–691, 2016.
- 422 Hilbert J Kappen. [An introduction to stochastic control theory, path integrals and reinforcement](#)  
423 [learning](#). In *AIP conference proceedings*, volume 887, pages 149–181. American Institute of  
424 Physics, 2007.
- 425 Chence Shi, Shitong Luo, Minkai Xu, and Jian Tang. [Learning gradient fields for molecular](#)  
426 [conformation generation](#). In *International Conference on Machine Learning*, pages 9558–9568.  
427 PMLR, 2021.
- 428 Taco Cohen and Max Welling. [Group equivariant convolutional networks](#). In *International conference*  
429 [on machine learning](#), pages 2990–2999. PMLR, 2016.
- 430 Victor Garcia Satorras, Emiel Hooeboom, and Max Welling. [E\(n\) equivariant graph neural networks](#).  
431 *arXiv preprint arXiv:2102.09844*, 2021.

- 432 Peter Eastman, Jason Swails, John D Chodera, Robert T McGibbon, Yutong Zhao, Kyle A Beauchamp,  
433 Lee-Ping Wang, Andrew C Simmonett, Matthew P Harrigan, Chaya D Stern, et al. [OpenMM 7:  
434 Rapid development of high performance algorithms for molecular dynamics.](#) *PLoS computational  
435 biology*, 13(7):e1005659, 2017.
- 436 Shinya Honda, Kazuhiko Yamasaki, Yoshito Sawada, and Hisayuki Morii. [10 residue folded peptide  
437 designed by segment statistics.](#) *Structure*, 12(8):1507–1518, 2004.
- 438 M Marvin Seibert, Alexandra Patriksson, Berk Hess, and David Van Der Spoel. [Reproducible  
439 polypeptide folding and structure prediction using molecular dynamics simulations.](#) *Journal of  
440 molecular biology*, 354(1):173–183, 2005.
- 441 Daisuke Satoh, Kentaro Shimizu, Shugo Nakamura, and Tohru Terada. [Folding free-energy landscape  
442 of a 10-residue mini-protein, chignolin.](#) *FEBS letters*, 580(14):3422–3426, 2006.
- 443 Cristina Papissoni and Carlo Camilloni. [How to determine accurate conformational ensembles by  
444 metadynamics metainference: a chignolin study case.](#) *Frontiers in molecular biosciences*, 8:491,  
445 2021.
- 446 Ryuhei Harada and Akio Kitao. [Exploring the folding free energy landscape of a  \$\beta\$ -hairpin minipro-  
447 tein, chignolin, using multiscale free energy landscape calculation method.](#) *The Journal of Physical  
448 Chemistry B*, 115(27):8806–8812, 2011.
- 449 Atsushi Suenaga, Tetsu Narumi, Noriyuki Futatsugi, Ryoko Yanai, Yousuke Ohno, Noriaki Okimoto,  
450 and Makoto Taiji. [Folding dynamics of 10-residue  \$\beta\$ -hairpin peptide chignolin.](#) *Chemistry–An  
451 Asian Journal*, 2(5):591–598, 2007.
- 452 Søren Enemark, Nicholas A Kurniawan, and Raj Rajagopalan.  [\$\beta\$ -Hairpin forms by rolling up from  
453 C-terminal: Topological guidance of early folding dynamics.](#) *Scientific Reports*, 2(1):1–6, 2012.
- 454 Kresten Lindorff-Larsen, Stefano Piana, Ron O Dror, and David E Shaw. [How fast-folding proteins  
455 fold.](#) *Science*, 334(6055):517–520, 2011.
- 456 Robert H Cameron and William T Martin. [Transformations of weiner integrals under translations.](#)  
457 *Annals of Mathematics*, pages 386–396, 1944.
- 458 David A Sivak, John D Chodera, and Gavin E Crooks. [Using nonequilibrium fluctuation theorems to  
459 understand and correct errors in equilibrium and nonequilibrium simulations of discrete Langevin  
460 dynamics.](#) *Physical Review X*, 3(1):011007, 2013.
- 461 Kresten Lindorff-Larsen, Stefano Piana, Kim Palmo, Paul Maragakis, John L Klepeis, Ron O Dror,  
462 and David E Shaw. [Improved side-chain torsion potentials for the Amber ff99SB protein force  
463 field.](#) *Proteins: Structure, Function, and Bioinformatics*, 78(8):1950–1958, 2010.
- 464 Ulrich Essmann, Lalith Perera, Max L Berkowitz, Tom Darden, Hsing Lee, and Lee G Pedersen. [A  
465 smooth particle mesh Ewald method.](#) *The Journal of chemical physics*, 103(19):8577–8593, 1995.

466 **A Proof theorem: SOC solves the BPTP problem**

467 **Theorem A.1** (SOC solves the BPTP problem). Given  $\mathbf{x}_t = (\mathbf{r}_t, \mathbf{v}_t)^T$ ,  $\mathbf{f}(\mathbf{x}_t) = (\mathbf{v}_t, \frac{-\nabla_{\mathbf{r}_t} U(\mathbf{r}_t) - \gamma \mathbf{v}_t}{m})^T$ ,  $\mathbf{G}(\mathbf{x}_t) = (\mathbf{0}_{3n}, \mathbb{I}_{3n})^T$ ,  $\mathbf{u}(\mathbf{x}_t) = \frac{-\nabla_{\mathbf{r}_t} b(\mathbf{r}_t, \mathbf{v}_t)}{m}$ ,  $\nu = \sqrt{2m\gamma k_B T}$ , and  $\pi_0 = \pi_G$ , such that the  
 468 SOC dynamics (eq. (11)) describe the dynamics of the BPTP distribution  $\pi^b$  (eq. (5)).  
 469

470 If we define  $\varphi(\mathbf{x}_\tau) = -\lambda \log(\mathbf{1}_P(\mathbf{r}_\tau))$ ,  $\mathbf{R} = \lambda \nu^{-1} = \lambda(2m\gamma k_B T)^{-1}$  and assume  $\mathbf{r}_0 \in R$ , we have

$$\arg \min_b \mathbb{E}_{\mathbf{x}_{0:\tau} \sim \pi^b} [C(\mathbf{x}_{0:\tau})] = \arg \min_b \mathbb{D}_{\text{KL}}(\pi^b | \pi^*), \quad (17)$$

471 where  $\pi^*$  is the TP distribution.

472 *Proof.* Let  $\pi^b$  be the BPTP distribution as defined in eq. (7). Crucially,  $\pi^b$  can be factored into a  
 473 position and velocity component based on the conditional independence of  $\mathbf{r}_{t+1}$  and  $\mathbf{v}_{t+1}$  given  $\mathbf{r}_t$   
 474 and  $\mathbf{v}_t$ , respectively, as

$$\pi^b(\mathbf{x}_{0:\tau}) = \pi_{\mathbf{r}}^b(\mathbf{x}_{0:\tau}) \cdot \pi_{\mathbf{v}}^b(\mathbf{x}_{0:\tau}) \quad (18)$$

475 with

$$\pi_{\mathbf{r}}^b(\mathbf{x}_{0:\tau}) = \prod_{t=0}^{\tau} \mathbb{1}_{[\mathbf{r}_{t+1} = \mathbf{r}_t + \mathbf{v}_t]}(\mathbf{r}_{t+1}) \quad (19)$$

$$\pi_{\mathbf{v}}^b(\mathbf{x}_{0:\tau}) = \prod_{t=0}^{\tau} \mathcal{N}(\mathbf{v}_{t+1} | \boldsymbol{\mu}_t, \Sigma_t). \quad (20)$$

476 where  $\boldsymbol{\mu}_t = (\mathbf{v}_t \cdot dt, \frac{-\nabla_{\mathbf{r}}(U(\mathbf{r}_t) + b(\mathbf{r}_t, \mathbf{v}_t))}{m} \cdot dt - \gamma \mathbf{v}_t \cdot dt)^T$  and  $\Sigma = \text{diag}(0, 2m\gamma k_B T)$ .

477 Now, if we define  $\pi^0$  to be the BPTP distribution where no additional bias potential is applied, i.e.  
 478  $b(\mathbf{r}_t, \mathbf{x}_t) = 0$  such that  $\pi^0(\mathbf{x}_{0:\tau}) = \mathbf{1}_R(\mathbf{r}_0) \cdot \pi(\mathbf{x}_{0:\tau})$ , we observe that the position component of the  
 479 factorization are equal:  $\pi_{\mathbf{r}}^b(\mathbf{x}_{0:\tau}) = \pi_{\mathbf{r}}^0(\mathbf{x}_{0:\tau})$ .

480 Following, we use Girsanov's [Cameron and Martin, 1944] theorem to relate  $\pi_{\mathbf{v}}^b(\mathbf{x}_{0:\tau})$  and  $\pi_{\mathbf{v}}^0(\mathbf{x}_{0:\tau})$   
 481 as

$$\pi_{\mathbf{v}}^b(\mathbf{x}_{0:\tau}) = \pi_{\mathbf{v}}^0(\mathbf{x}_{0:\tau}) \cdot \exp\left(\frac{1}{\lambda} \sum_{t=0}^{\tau-1} \frac{1}{2} \mathbf{u}(\mathbf{x}_t)^T \mathbf{R} \mathbf{u}(\mathbf{x}_t) + \mathbf{u}(\mathbf{x}_t)^T \mathbf{R} \boldsymbol{\varepsilon}_t\right) \quad (21)$$

482 where  $\boldsymbol{\varepsilon} = \mathbf{G}^{-1}(\mathbf{x}_t)(d\mathbf{x} - \mathbf{f}(\mathbf{x}_t) dt) - \mathbf{u}(\mathbf{x}_t)$ . Which, given the previously established equality  
 483 between the velocity components of the BPTP factorization, gives us

$$\log \frac{\pi^b(\mathbf{x}_{0:\tau})}{\pi^0(\mathbf{x}_{0:\tau})} = \frac{1}{\lambda} \sum_{t=0}^{\tau-1} \frac{1}{2} \mathbf{u}(\mathbf{x}_t)^T \mathbf{R} \mathbf{u}(\mathbf{x}_t) + \mathbf{u}(\mathbf{x}_t)^T \mathbf{R} \boldsymbol{\varepsilon}_t \quad (22)$$

484 where  $\boldsymbol{\varepsilon} = \mathbf{G}^{-1}(\mathbf{x}_t)(d\mathbf{x} - \mathbf{f}(\mathbf{x}_t) dt) - \mathbf{u}(\mathbf{x}_t)$ .

485 This allows us to rewrite the control cost eq. (13) as

$$C(\mathbf{x}_{0:\tau}) = \frac{1}{\lambda} \left( \varphi(\mathbf{x}_{0:\tau}) \right) + \log \frac{\pi^b(\mathbf{x}_{0:\tau})}{\pi^0(\mathbf{x}_{0:\tau})} \quad (23)$$

486 Finally, this gives

$$\arg \min_b \mathbb{E}_{\mathbf{x}_{0:\tau} \sim \pi^b} [C(\mathbf{x}_{0:\tau})] = \arg \min_b \mathbb{E}_{\mathbf{x}_{0:\tau} \sim \pi^b} \left[ \frac{1}{\lambda} (\varphi(\mathbf{x}_\tau)) + \log \frac{\pi^b(\mathbf{x}_{0:\tau})}{\pi^0(\mathbf{x}_{0:\tau})} \right] \quad (24)$$

$$= \arg \min_b \mathbb{E}_{\mathbf{x}_{0:\tau} \sim \pi^b} \left[ -\log(\mathbf{1}_P(\mathbf{r}_\tau)) + \log \frac{\pi^b(\mathbf{x}_{0:\tau})}{\pi^0(\mathbf{x}_{0:\tau})} \right] \quad (25)$$

$$= \arg \min_b \mathbb{E}_{\mathbf{x}_{0:\tau} \sim \pi^b} \left[ \log \frac{\pi^b(\mathbf{x}_{0:\tau})}{\mathbf{1}_R(\mathbf{r}_\tau) \cdot \pi(\mathbf{x}_{0:\tau}) \cdot \mathbf{1}_P(\mathbf{r}_\tau)} \right] \quad (26)$$

$$= \arg \min_b \mathbb{E}_{\mathbf{x}_{0:\tau} \sim \pi^b} \left[ \log \frac{\pi^b(\mathbf{x}_{0:\tau})}{\pi^*(\mathbf{x}_{0:\tau})} \right] \quad (27)$$

$$= \arg \min_b \mathbb{D}_{\text{KL}}(\pi^b | \pi^*) \quad (28)$$

487 where  $\pi^*$  is the TP distribution as defined in definition 1.

488

□

## 489 B Algorithms

---

### Algorithm 1: Training Policy $\mathbf{u}_\theta$

---

**Input:**  $\mathbf{r}_0, \mathbf{r}_T$ : Initial and target molecular positions,  
 $U(\cdot)$ : Potential Energy function,  
 $\gamma$ : Langevin Friction,  
 $\varphi(\cdot)$ : Terminal cost,  
 $\mathbf{u}_\theta(\cdot, \cdot)$ : Initial parameterized policy,  
 $N$ : Number of trajectories sampled per update,  
 $\tau$ : Time horizon,  
 $\nu$ : Variance of Brownian noise,  
 $\mathbf{R}$ : Control cost matrix,  
 $\mu$ : Learning rate,  
 $dt$ : Time discretization step

**while not converged do**

▷ Generate trajectories with current policy  $\mathbf{u}_\theta$

$\lambda \leftarrow \mathbf{R}\nu$ ;

$n \leftarrow 0$ ;

**while**  $n < N$  **do**

▷ Initialize initial trajectory state

$(\mathbf{r}_{n,0}, \mathbf{v}_{n,0}, t) \leftarrow (\mathbf{r}_0, \mathbf{0}, 0)$ ;

**while**  $t < (\tau / dt)$  **do**

▷ Sample Brownian noise and action

$\varepsilon_{n,t} \sim \mathcal{N}(0, \sqrt{2m\gamma k_B T})$ ;

$\hat{\varepsilon}_{n,t} \sim \mathcal{N}(0, \nu)$ ;

$\mathbf{u}_{n,t} \leftarrow \mathbf{u}_\theta(\mathbf{r}_{n,t}, t)$ ;

▷ Update positions and velocity

$\mathbf{r}_{n,t+1} \leftarrow \mathbf{r}_{n,t} + \mathbf{v}_{n,t} \cdot dt$ ;

$\mathbf{v}_{n,t+1} \leftarrow \mathbf{v}_{n,t} + \left( \frac{-\nabla_{\mathbf{r}} U(\mathbf{r})}{m} + \mathbf{u}_{n,t} - \gamma \mathbf{v} + \varepsilon_{n,t} + \hat{\varepsilon}_{n,t} \right) \cdot dt$ ;

$t \leftarrow t + 1$ ;

**end**

▷ Determine trajectory cost and gradient

$C_n \leftarrow \frac{1}{\lambda} (\varphi(\mathbf{r}_{n,\tau}) + \sum_{i=0}^{\tau} \mathbf{u}_{n,i}^T \mathbf{R} \mathbf{u}_{n,i} + \mathbf{u}_{n,i}^T \mathbf{R} \varepsilon_{n,i})$ ;

$\Delta \theta_n \leftarrow \exp(-C_n) + \sum_{i=0}^{\tau} \frac{\partial \mathbf{u}_{n,i}}{\partial \theta} \mathbf{R} \varepsilon_{n,i}$ ;

$n \leftarrow n + 1$ ;

**end**

▷ Determine gradient normalization and perform policy update

$\eta \leftarrow \sum_{i=0}^N \exp(-C_i)$ ;

$\theta \leftarrow \theta + \frac{\mu}{\eta} \sum_{i=0}^N \Delta \theta_i$ ;

**end**

---

## 491 C Extension Experimental section

### 492 C.1 OpenMM

493 **General setup:** We use the Velocity Verlet with Velocity Randomization (VVVR) integrator [Sivak  
494 et al., 2013] within OpenMM at a temperature of 300 K with a collision rate of  $1.0 \text{ ps}^{-1}$ . All code is  
495 implemented in Pytorch and ran on a single GPU (either an NVIDIA RTX3080 or RTX2080).

496 **Alanine Dipeptide:** We use the amber 99sb-ildn force field [Lindorff-Larsen et al., 2010] without  
497 any solvent, a time-step of 1.0 fs for the VVVR integrator and a cutoff of 1 nm for the Particle Mesh  
498 Ewald (PME) method [Essmann et al., 1995]. The policy network for 15000 roll-outs with a time  
499 horizon of 500 fs each consisting of 16 samples. A gradient update was made to the policy network  
500 after each roll-out with a learning rate of  $10^{-5}$ . The Brownian motion has a standard deviation of 0.1.

501 **Polyproline Helix:** We initialize OpenMM with the amber protein.ff14SBonlysc forcefield and  
502 gbn2 as the implicit solvent forcefield. The VVVR integrator had a timestep of 2.0 fs and a cutoff  
503 of 5 nm for PME. The proposed method was ran for a total of 10,000 fs (resulting in 5,000 policy  
504 steps). The policy networks was trained over 500 rollouts with 25 samples each using a learning rate  
505 of  $3 \times 10^{-5}$  and a standard deviation of 0.1 for the Brownian motion.

506 **Chignolin:** To sample transition paths between the folded and unfolded state of the Chignolin  
507 protein, we initialize OpenMM using the same forcefield and VVVR integrator as for Polyproline  
508 with the exception that we sample a new force from our policy network every 1.0 fs. We do this  
509 5000 times for each rollout for a total time horizon of 5000 fs. The policy network is trained for 500  
510 roll-outs of 16 samples with a learning rate of  $10^{-4}$  and a standard deviation of 0.05 for the Brownian  
511 motion.

### 512 C.2 Alanine Dipeptide

#### 513 C.2.1 Discussion Baselines and Evaluation Metrics

514 **Metrics** Three different metrics are used for the comparison covering multiple desiderata for the  
515 sampled transition trajectories. For each metric we report the score over 1000 trajectories with the  
516 exception of the *Molecular Dynamics without fixed timescale* baseline which is only ran until 10  
517 trajectories are successfully generated.

518 *Expected Pairwise Distance (EPD)* The EPD measures the similarity between the final conformation  
519 in the trajectory and the target conformation taking into account the full 3D geometry of the molecule.  
520 Note that the expected pairwise distance for uncontrolled MD with the target as the starting conforma-  
521 tion has a EPD of  $2.25 \times 10^{-3}$ . All trajectories with an EPD of less than this can thus be considered  
522 to transition the molecule within one standard deviation of the target distribution.

523 *Target Hit Percentage (THP):* The second metric under which we evaluate the proposed Transition  
524 Path Sampler measures the similarity of the final and target conformation in terms of the collective  
525 variables. The THP measures the percentage of generated trajectories/paths that reach the target state.  
526 As such, higher hit percentages are preferred. We determine a trajectory to have hit the target in CV  
527 space when  $\phi$  and  $\psi$  are both within 0.75 of the target.

528 *Energy Transition Point (ETP):* The final metric looks at the potential energy of the transition  
529 point—the conformation in the trajectory with the highest potential energy. This directly evaluates  
530 the capability of the method to find the transition path that crosses the boundary at the lowest saddle  
531 point.

532 **Baselines** We compare the proposed Transition Path Sampling method with extended Molecular  
533 Dynamics simulation using different time-scales and temperature points. As discussed earlier, there  
534 are currently no other methods available for Transition Path Sampling using the full 3D geometry of  
535 the molecules.

536 *Molecular Dynamics with fixed timescale:* This set of baselines is limited to the same timescale  
537 as the proposed Transition Path Sampler, 500 femtoseconds, but uses varying temperatures. With

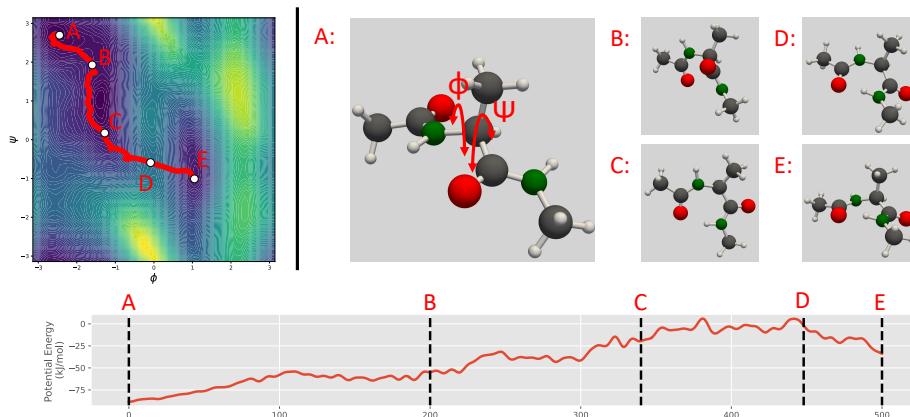

Figure 5: Visualization of a trajectory sampled with the proposed force prediction method. *Left:* The sampled trajectory projected on the free energy landscape of Alanine Dipeptide as a function of two CVs *Right:* Conformations along the sampled trajectory: A) starting conformation showing the CV dihedral angles, B-D) intermediate conformations with D being the highest energy point on the trajectory, and E) final conformation, which closely aligns with the target conformation. *Bottom:* Potential energy during transition. Letters represent the same configurations in the transition.

538 higher temperatures we should have a higher probability of crossing the barrier and hitting the target  
 539 configuration.

540 *Molecule Dynamics without fixed timescales:* In contrast to the other set of baselines, the MD simu-  
 541 lation for this set is not limited to 500 femtoseconds, but is instead ran until the target conforma-  
 542 tion is reached. We consider a trajectory to have reached its target if the following two conditions have  
 543 been met: 1) the current conformation classifies as having hit the target under the conditions of the  
 544 metric described above and 2) the current conformation is within one standard deviation of the target  
 545 distributions mean.

546 By running the MD simulations until the target is reached we aim to gain intuition into the speed-up  
 547 that it achieved by the fixed timescale of the proposed Transition Path Sampler.

### 548 C.2.2 Additional results: Visualization Force Prediction

549 We observe that the force predicting policy has learned a different trajectory then the energy predicting  
 550 model presented in the main body of the paper. While different, both of the trajectories pass the high  
 551 energy barrier in a locally low point. Previous work on finding transition path has also observed that  
 552 multiple viable paths can be found for Alanine Dipeptide [Hoof et al., 2021].
